# Supplementary material for: Clinical Impact of Supplementation with Pasteurized Donor Human Milk by High-Temperature Short-Time Method versus Holder Method in Extremely Low Birth Weight Infants: A Multicentre Randomized Controlled Trial
Source: MDPI journal article supplement (doi:10.3390/nu16071090), 2024-04-08
Supplement: s1 [file s1]

## SUPPLEMENTARY MATERIALS

Table S1. Clinical variables during admission considering the 2 groups of pasteurization.

|                                                          | HTST GROUP<br>(N=79) | HOLDER GROUP<br>(N=81) | P value      |
|----------------------------------------------------------|----------------------|------------------------|--------------|
|                                                          | Median (IQR)         | Median (IQR)           |              |
| Catheter days                                            | 16 (10; 26)          | 18 (10;32)             | 0.29         |
| Days of parenteral nutrition (admission)                 | 18 (11;27)           | 21 (10;35)             | 0.33         |
| Days of antibiotics during (admission)                   | 9 (2;20)             | 9 (3;23)               | 0.36         |
| Days of antibiotics first 28 days of life                | 7 (3;13)             | 8 (2;17)               | 0.64         |
| Days of probiotics during admission                      | 12 (0;43)            | 20 (0;39)              | 0.69         |
| DHM volume first 28 days of life (mL/kg/day)             | 5.2 (1.8;22.5)       | 6.8 (2.1; 32)          | 0.3          |
| MOM volume first 28 days of life<br>(mL/kg/day)          | 56.6 (25.8; 94.2)    | 35.3 (8.9; 77.9)       | <b>0.017</b> |
| DHM volume up to 34 weeks PMA<br>(mL/kg/day)             | 5.9 (1.4;53.8)       | 25.8 (4.2; 56.3)       | 0.14         |
| MOM volume up to 34 weeks PMA<br>(mL/kg/day)             | 84,6 (3.4;118.2)     | 48 (7.4; 107.8)        | <b>0.015</b> |
| Nº doses oropharyngeal colostrum first 4 days<br>of life | 3 (0;9)              | 3 (0;7)                | 0.33         |
|                                                          | N (%)                | N (%)                  |              |
| Postnatal corticosteroids                                | 12 (15)              | 13 (16.1)              | 0.88         |
| Received anti-acids (admission)                          | 24 (30.4)            | 17 (21)                | 0.17         |
| Received vasoactive drugs (admission)                    | 32 (41)              | 34 (42)                | 0.65         |
| Received ibuprofen for PDA (admission)                   | 35% (28)             | 25 (31)                | 0.52         |
| Received paracetamol for PDA (admission)                 | 27% (21)             | 20 (25)                | 0.77         |

IQR: interquartile range; DHM: donor human milk; MOM: mother's own milk; PMA: postmenstrual age; PDA: patent ductus arteriosus.

Table S2 Baseline characteristics by study center.

|                                                   | CENTER 1         | CENTER 2       |              |
|---------------------------------------------------|------------------|----------------|--------------|
|                                                   | N=95             | N=65           |              |
|                                                   | N (%)            | N (%)          | P value      |
| Sex (Male)                                        | 44 (46)          | 25 (38)        | 0.32         |
| Multiple pregnancy ( $\geq 2$ )                   | 33 (34.7)        | 20 (30.8)      | 0.36         |
| Pregnancy (Well-controlled)                       | 89 (93.7)        | 57 (87.7)      | 0.19         |
| Country of origin Spain                           | 54 (58)          | 39 (67)        | 0.26         |
| Antenatal corticosteroids ( $\geq 1$ full course) | 80 (84.2)        | 47 (72.3)      | 0.07         |
| Low weight for gestational age ( $p < 10$ )       | 34 (36)          | 12 (18)        | <b>0.017</b> |
|                                                   | Median (IQR)     | Median (IQR)   | P value      |
| Gestational age (weeks)                           | 27 (25; 28)      | 26 (25;27)     | 0.12         |
| Birth weight (grams)                              | 820 (640; 920)   | 817 (716; 897) | 0.49         |
| Fenton z score for birth weight                   | -0.7 (-1.5;-0.2) | -0.2 (-1;+0.2) | <b>0.012</b> |
| Apgar score 5 minutes                             | 8 (6;9)          | 7 (5;5.9)      | 0.078        |
| CRIB I score                                      | 7 ( 2;9)         | 5 (2;8)        | 0.34         |

IQR: interquartile range; CRIB: index of clinical risk in babies, first version.

Table S3 Clinical variables during admission by study center.

IQR: interquartile range; DHM: donor human milk; MOM: mother's own milk; PMA: postmenstrual age; PDA: patent ductus arteriosus.

|                                                          | CENTER 1<br>(N=95) | CENTER 2<br>(N=65) | P value |
|----------------------------------------------------------|--------------------|--------------------|---------|
|                                                          | Median (IQR)       | Median (IQR)       |         |
| Catheter days                                            | 17 (10;31)         | 18 (10;27)         | 0.636   |
| Days of parenteral nutrition (admission)                 | 18 (11;33)         | 20 (11;28)         | 0.73    |
| Days of antibiotics during (admission)                   | 7 (2;18)           | 16 (6;27)          | 0.056   |
| Days of antibiotics first 28 days of life                | 5 (2;10)           | 12 (5;19)          | <0.001  |
| Days of probiotics during admission                      | 39 (21;48)         | 0 (0;0)            | <0.001  |
| DHM volume first 28 days of life (mL/kg/day)             | 8.7 (2.8;35.9)     | 3.4 (1.4;16.1)     | 0.004   |
| MOM volume first 28 of life (mL/kg/day)                  | 43.2 (12.9; 89.2)  | 54 (22;81.2)       | 0.69    |
| DHM volume up to 34 weeks PMA<br>(mL/kg/day)             | 15.2 (4.3;69.8)    | 3.7 (1.2;40.8)     | 0.03    |
| MOM volume up to 34 weeks PMA<br>(mL/kg/day)             | 54.6 (12.4;112.6)  | 81.6 (17.3;109.7)  | 0.45    |
| Nº doses oropharyngeal colostrum first 4 days<br>of life | 3 (0;9)            | 3 (0; 7)           | 0.33    |
|                                                          | N (%)              | N (%)              |         |
| Postnatal corticosteroids                                | 12 (12.6)          | 13 (20)            | 0.20    |
| Received probiotics (admission)                          | 92 (97)            | 0 (0)              | <0.001  |
| Received anti-acids (admission)                          | 7 (7.4)            | 34 (52.3)          | <0.001  |
| Received vasoactive drugs (admission)                    | 37 (39)            | 29 (45)            | 0.39    |
| Received ibuprofen for PDA, (admission)                  | 30 (32)            | 23 (35)            | 0.49    |
| Received paracetamol for PDA (admission)                 | 16 (17)            | 25 (38)            | 0.002   |
