# Supplementary figures and images for: Clinical Impact of Supplementation with Pasteurized Donor Human Milk by High-Temperature Short-Time Method versus Holder Method in Extremely Low Birth Weight Infants: A Multicentre Randomized Controlled Trial
Source: MDPI journal article supplement (doi:10.3390/nu16071090), 2024-04-08

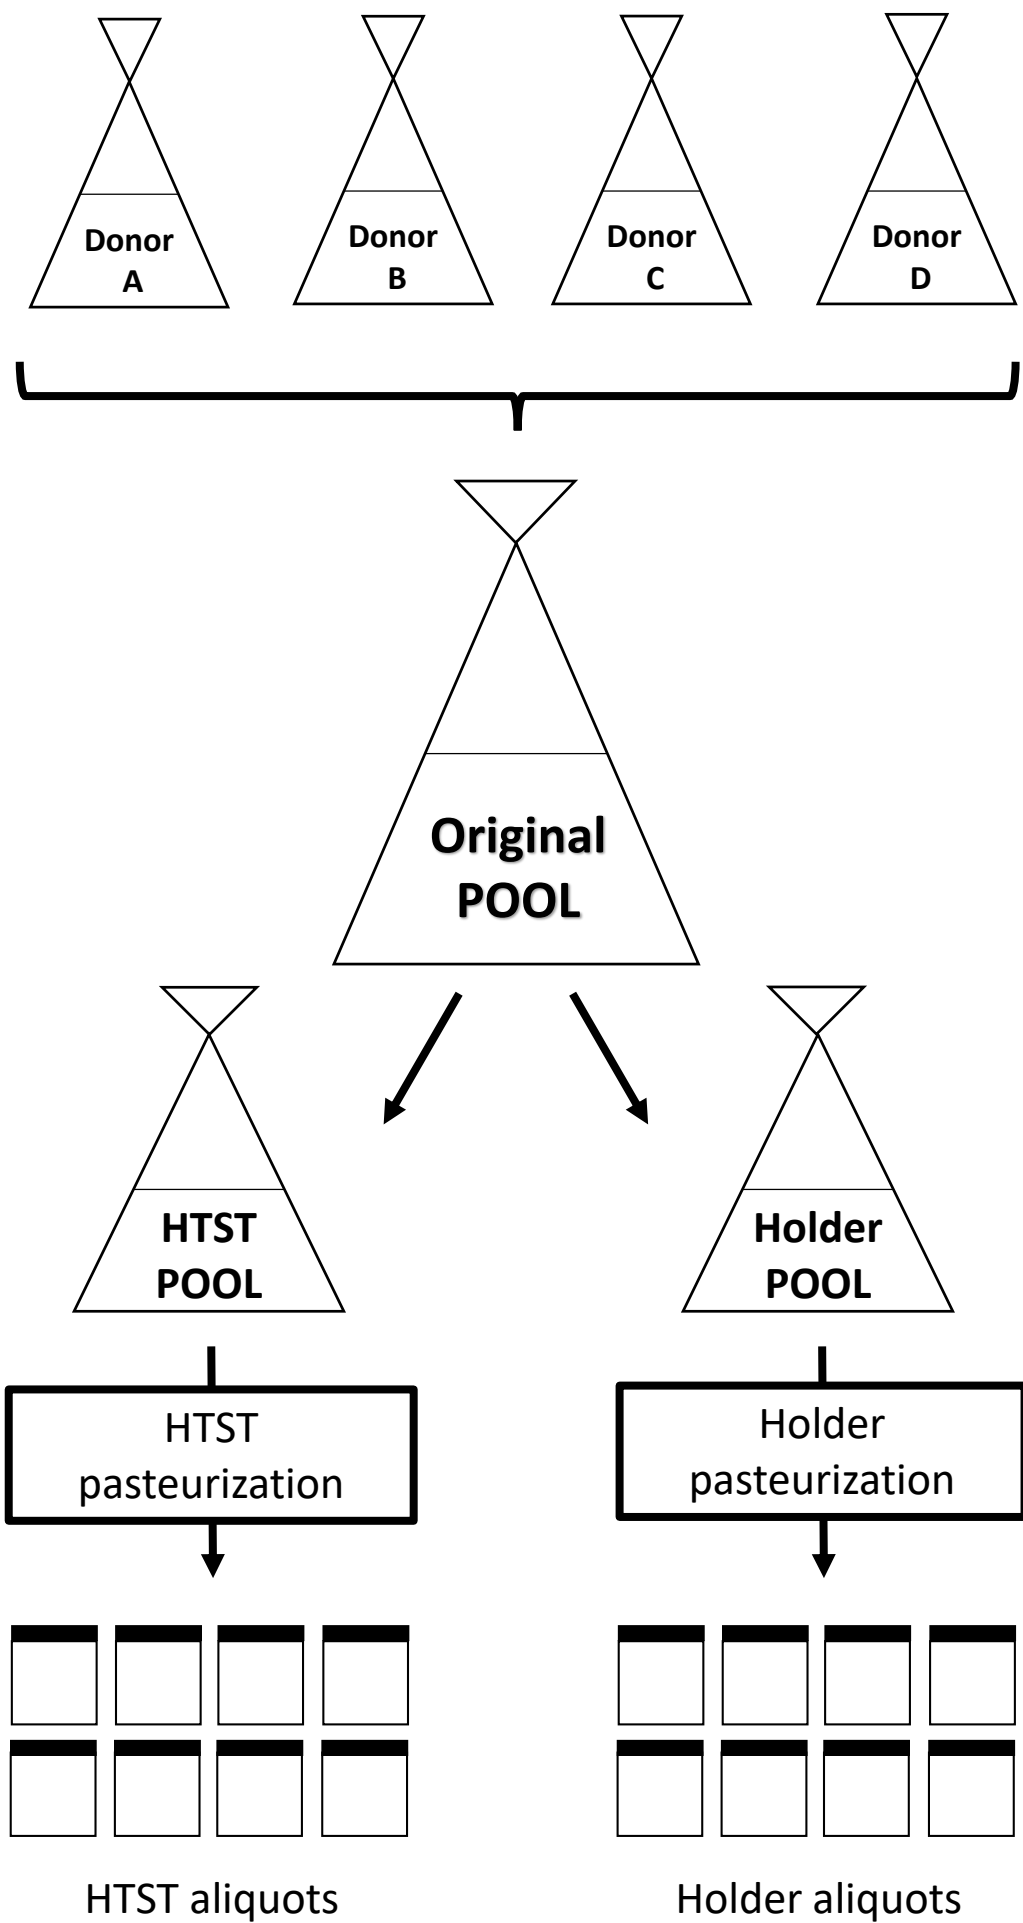

**Figure S1. DHM batches for study**

Supplement: s1 [file s1]

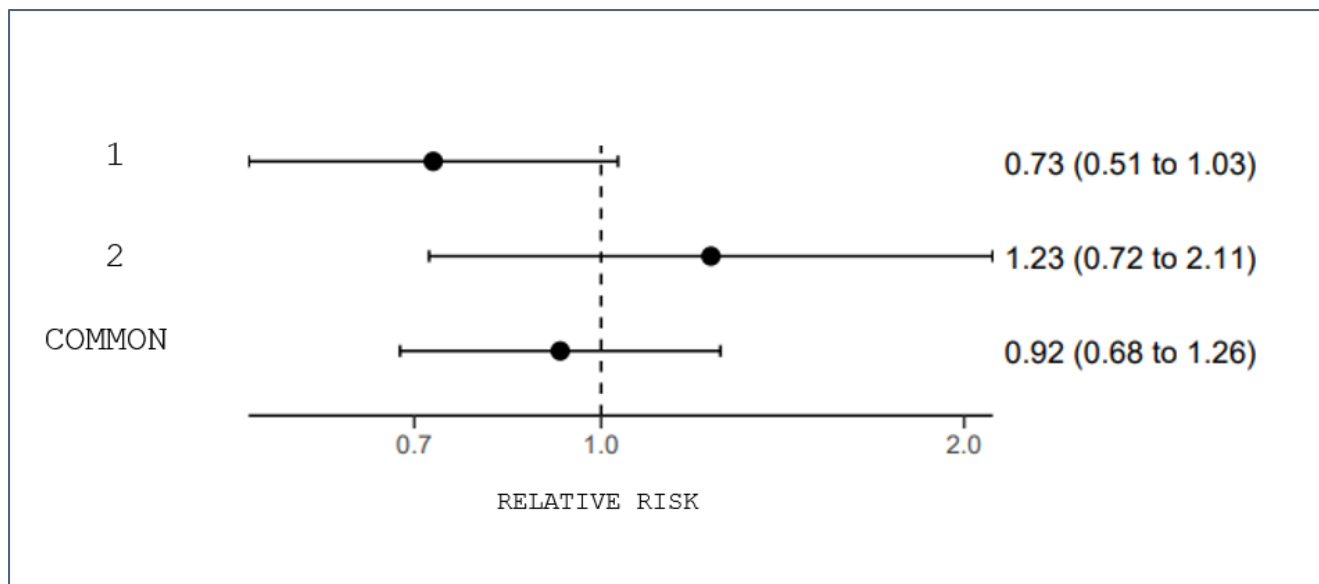

Figure S2. Subgroup effect (HTST vs Holder) by study centre (Relative risk and 95% CI)

Supplement: s1 [file s1]
